# Supplementary material
Source: Springer Nature journal article supplement (https://www.springermedizin.de/resource/supplementary/12885_2012_3685_MOESM8_ESM.pdf/9465928)

— HuR N/TUBB3Low/miR-200c-High  
- - - HuR C/TUBB3High/miR-200c-High

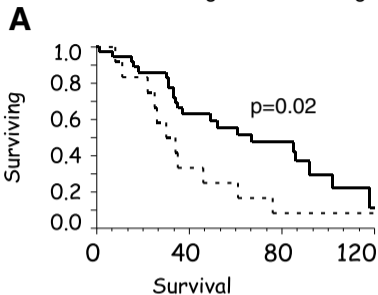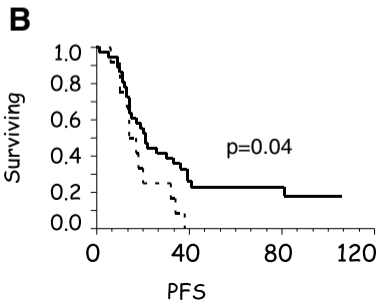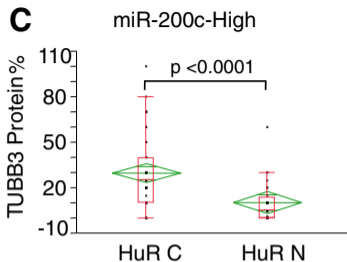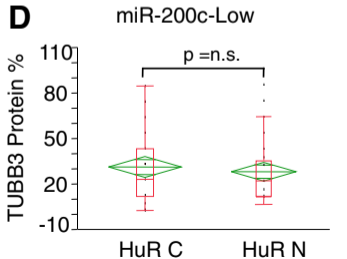

Supplement: MOESM8 [file 9465928]
